# Supplementary material
Source: HighWire-hosted journal article supplement (https://cmaj.ca/highwire/filestream/59596/field_highwire_adjunct_files/1/150771-res-Appendix_10.pdf)
Supplement: 150771-res-Appendix_10.pdf [file 150771-res-Appendix_10.pdf]

**Appendix 10 (as supplied by the authors): Incidence and Risk of All-Cause Death, Major Adverse Cardiac Events, and Hospitalization for Acute Kidney Injury and Hyperkalemia Among Patients Using ARBs and ACEIs After Propensity Score Matching**

|                                         | ARB cohort   |              |                 | ACEI cohort (As Reference) |              |                 | Crude                 | Competing Risk <sup>‡</sup> |
|-----------------------------------------|--------------|--------------|-----------------|----------------------------|--------------|-----------------|-----------------------|-----------------------------|
|                                         | No. of Event | Person-years | Incidence rate* | No. of Event               | Person-years | Incidence rate* | Hazard Ratio (95% CI) | Hazard Ratio (95% CI)       |
| <b>Intention-to-treat analysis</b>      |              |              |                 |                            |              |                 |                       |                             |
| All-cause death                         | 1,421        | 54,620       | 26.02           | 1,500                      | 54,129       | 27.71           | 0.94 (0.87-1.01)      | -                           |
| Major adverse cardiac events            | 944          | 52,004       | 18.15           | 978                        | 51,409       | 19.02           | 0.95 (0.87-1.04)      | 0.96 (0.88-1.05)            |
| Myocardial infarction                   | 317          | 53,867       | 5.88            | 306                        | 53,501       | 5.72            | 1.03 (0.88-1.20)      | 1.03 (0.88-1.21)            |
| Ischemic Stroke                         | 685          | 52,664       | 13.01           | 720                        | 51,966       | 13.86           | 0.94 (0.85-1.04)      | 0.94 (0.85-1.05)            |
| Cardiovascular death                    | 417          | 54,581       | 7.64            | 408                        | 54,103       | 7.54            | 1.01 (0.88-1.16)      | -                           |
| Hospitalization for acute kidney injury | 671          | 53,311       | 12.59           | 656                        | 52,829       | 12.42           | 1.01 (0.91-1.13)      | 1.02 (0.91-1.13)            |
| Hospitalization for hyperkalemia        | 320          | 53,892       | 5.94            | 314                        | 53,325       | 5.89            | 1.01 (0.86-1.18)      | 1.01 (0.87-1.18)            |
| <b>As-treated analysis</b>              |              |              |                 |                            |              |                 |                       |                             |
| All-cause death                         | 252          | 32,765       | 7.69            | 163                        | 21,546       | 7.57            | 1.06 (0.87-1.29)      | -                           |
| Major adverse cardiac events            | 463          | 32,036       | 14.45           | 321                        | 21,213       | 15.13           | 0.96 (0.83-1.11)      | 1.03 (0.89-1.19)            |
| Myocardial infarction                   | 139          | 32,583       | 4.27            | 788                        | 21,486       | 3.63            | 1.16 (0.87-1.53)      | 1.25 (0.95-1.66)            |
| Ischemic Stroke                         | 342          | 32,201       | 10.62           | 251                        | 21,272       | 11.80           | 0.91 (0.77-1.08)      | 0.98 (0.84-1.16)            |
| Cardiovascular death                    | 41           | 32,762       | 1.25            | 19                         | 21,546       | 0.88            | 1.41 (0.81-2.44)      | -                           |
| Hospitalization for acute kidney injury | 276          | 32,456       | 8.50            | 154                        | 21,430       | 7.19            | 1.19 (0.98-1.46)      | 1.27 (1.05-1.55)            |
| Hospitalization for hyperkalemia        | 122          | 32,602       | 3.74            | 81                         | 21,438       | 3.78            | 1.02 (0.77-1.35)      | 1.09 (0.83-1.44)            |

\* per 10<sup>3</sup> person-years.

<sup>‡</sup>Death as a competing risk in this model.

Abbreviations: CI, confidence interval; ARB, Angiotensin II receptor blockers; ACEI, angiotensin-converting-enzyme inhibitors.
